# Supplementary material
Source: Royal Society of Chemistry journal article supplement (doi:10.1039/d5fo04869a)
Supplement: d5fo04869a1.xlsx [file d5fo04869a1.xlsx]

## Sheet: Sheet1
DAI
	ABX_Control						ABX_DSS						ABX_Trp_DSS						ABX_Y42_DSS						ABX_Trp_Y42_DSS
1d	0	0	0	0	0	0	0	0	0	0	0	0	0	0	0	0	0	0	0	0	0	0	0	0	0	0	0	0	0	0
2d	0	1	0	1	0	0	1	1	0	0	0	1	0	0	0	1	0	0	2	1	2	1	2	2	0	1	0	0	1	1
3d	1	1	0	1	1	0	0	0	1	0	1	0	0	1	0	1	1	0	0	1	1	1	0	0	1	0	0	1	0	0
4d	0	0	0	0	0	0	0	0	0	0	0	3	0	1	0	0	0	0	0	0	1	0	0	1	0	1	0	0	0	0
5d	0	0	0	0	0	0	1	4	1	0	3	2	1	0	1	1	0	2	1	3	0	0	1	0	0	1	0	0	1	1
6d	0	0	0	0	0	0	3	6	4	4	3	6	0	3	4	3	1	3	1	4	0	3	1	0	0	0	3	0	0	0
7d	1	1	1	0	1	1	6	6	6	6	6	6	9	3	1	0	3	6	5	3	2	0	0	6	1	2	0	1	0	4
Thymus index (g/g)
ABX_Control						ABX_DSS						ABX_Trp_DSS						ABX_Y42_DSS						ABX_Trp_Y42_DSS
0.001033	0.001625	0.001449	0.000476	0.001075	0.001443	0.000848	0.001757	0.003369	0.000856	0.001715	0.001324	0.001043	0.001296	0.00121	0.001239	0.0016	0.002616	0.001251	0.008333	0.001068	0.001914	0.000839	0.00057	0.001916	0.001039	0.000868	0.00091	0.001352	0.001163
Spleen index (g/g)
ABX_Control						ABX_DSS						ABX_Trp_DSS						ABX_Y42_DSS						ABX_Trp_Y42_DSS
0.003707	0.003176	0.002947	0.002528	0.002988	0.003313	0.005377	0.004696	0.005135	0.005138	0.005011	0.006442	0.003828	0.003868	0.004777	0.004419	0.004307	0.004553	0.003814	0.004276	0.004485	0.004386	0.004382	0.00427	0.004147	0.004432	0.004399	0.00368	0.004005	0.003414
Colon length (cm)
ABX_Control						ABX_DSS						ABX_Trp_DSS						ABX_Y42_DSS						ABX_Trp_Y42_DSS
12.4	11.5	10.3	11.7	10.1	12.6	8.4	8.1	6.6	7.5	7.9	7.1	7.6	8.4	9.1	8.6	8.7	7.4	8.7	8.9	8.9	8	8.7	9.7	9.1	9.7	9.6	9.5	9.3	10.1
iNOS mRNA expression (fold of change)
ABX_Control						ABX_DSS						ABX_Trp_DSS						ABX_Y42_DSS						ABX_Trp_Y42_DSS
1.09177	0.937354	0.97716	1.01456	0.957257	1.03446	60.1295	60.9688	57.68	60.5491	59.3244	59.1146	36.5889	42.3219	40.039	39.4554	41.1805	38.3139	30.8386	29.5824	29.1751	30.2105	29.3788	30.0069	16.4119	16.8733	16.4119	16.6426	16.6426	16.4119
COX-2 mRNA expression (fold of change)
ABX_Control						ABX_DSS						ABX_Trp_DSS						ABX_Y42_DSS						ABX_Trp_Y42_DSS
1.10701	1.10701	0.816014	1.10701	0.961512	0.961512	11.5514	10.9283	8.33973	11.2399	9.63402	9.7898	3.70635	1.14076	1.53687	2.42356	1.33882	2.62161	2.19872	2.18354	1.64338	2.19113	1.91346	1.92105	1.86176	1.63203	2.21402	1.74689	1.92302	2.03789
P65 mRNA expression (fold of change)
ABX_Control						ABX_DSS						ABX_Trp_DSS						ABX_Y42_DSS						ABX_Trp_Y42_DSS
1.12246	0.827406	1.07674	0.974934	0.952072	1.0996	4.14106	4.46915	4.99332	4.3051	4.73123	4.64921	2.9897	3.70635	3.34035	3.34802	3.52335	3.16502	2.1386	2.32409	2.50822	2.23135	2.41616	2.32341	2.37292	2.34026	2.59668	2.35659	2.46847	2.4848
IκB-α mRNA expression (fold of change)
ABX_Control						ABX_DSS						ABX_Trp_DSS						ABX_Y42_DSS						ABX_Trp_Y42_DSS
1.10701	1.07674	0.838956	1.09187	0.957847	0.972982	7.56846	5.42642	4.19887	6.49744	4.81264	5.34815	2.96905	3.20428	3.03143	3.08666	3.11786	3.00024	2.2921	1.05458	1.27162	1.67334	1.1631	1.78186	1.17827	1.4406	1.17013	1.30943	1.30536	1.1742
Nrf2 mRNA expression (fold of change)
ABX_Control						ABX_DSS						ABX_Trp_DSS						ABX_Y42_DSS						ABX_Trp_Y42_DSS
0.968171	0.974905	1.05946	0.971538	1.01718	1.01382	0.460094	0.456916	0.456916	0.458505	0.456916	0.45771	0.479632	0.5	0.496546	0.489816	0.498273	0.488089	0.490843	0.487452	0.504642	0.489148	0.496047	0.497743	0.672062	0.585064	0.569066	0.628563	0.577065	0.620564
HO-1 mRNA expression (fold of change)
ABX_Control						ABX_DSS						ABX_Trp_DSS						ABX_Y42_DSS						ABX_Trp_Y42_DSS
0.903335	1.05215	1.05215	0.97774	1.05215	0.97774	0.777366	0.756109	0.943874	0.766738	0.849992	0.855306	1.40769	1.55114	1.5728	1.47942	1.56197	1.49025	1.17284	1.16473	1.23971	1.16878	1.20222	1.20627	1.25122	1.44727	1.06683	1.34924	1.25705	1.15902
Clca1 mRNA expression (fold of change)
ABX_Control						ABX_DSS						ABX_Trp_DSS						ABX_Y42_DSS						ABX_Trp_Y42_DSS
0.97942	1.04972	0.972655	1.01457	1.01119	0.976038	0.844791	0.874583	0.874583	0.859687	0.874583	0.867135	0.95705	1.26283	0.983957	1.10994	1.1234	0.970503	0.974905	0.948246	0.961483	0.961575	0.954865	0.968194	1.18099	1.28343	1.1487	1.23221	1.21606	1.16485
Fcgbp mRNA expression (fold of change)
ABX_Control						ABX_DSS						ABX_Trp_DSS						ABX_Y42_DSS						ABX_Trp_Y42_DSS
1.09682	0.831238	1.09682	0.964031	0.964031	1.09682	0.757858	0.76313	0.737135	0.760494	0.750132	0.748814	2.94173	3.19688	3.02444	3.06931	3.11066	2.98308	6.6807	7.51618	7.01285	7.09844	7.26451	6.84678	6.94833	6.75833	6.75833	6.85333	6.75833	6.85333
Zg16 mRNA expression (fold of change)
ABX_Control						ABX_DSS						ABX_Trp_DSS						ABX_Y42_DSS						ABX_Trp_Y42_DSS
1.03288	1.00463	0.963707	1.01875	0.984169	0.998291	0.461158	0.430276	0.445449	0.445717	0.437863	0.445583	0.846745	0.926588	1.02811	0.886667	0.977351	0.93743	1.92297	2.28681	2.03261	2.10489	2.15971	1.97779	2.02792	1.93187	2.17347	1.9799	2.05267	2.10069
IL-6 (pg/mL)
ABX_Control						ABX_DSS						ABX_Trp_DSS						ABX_Y42_DSS						ABX_Trp_Y42_DSS
40.5213	35.1886	48.1181	40.0279	29.966	36.1983	79.9907	61.7466	56.8585	78.1976	51.9658	66.7985	45.7173	49.9709	77.2312	53.8256	63.2596	49.3898	50.6908	57.0815	52.7981	43.0197	35.2704	55.8002	51.2172	49.7495	38.8774	43.1022	36.0891	53.6311
IL-10 (pg/mL)
ABX_Control						ABX_DSS						ABX_Trp_DSS						ABX_Y42_DSS						ABX_Trp_Y42_DSS
47.0442	42.6556	37.8564	45.936	38.418	39.9432	29.3933	37.3551	28.5951	34.3503	29.9922	26.6608	22.5001	28.9143	42.3943	26.2024	22.5995	32.03	31.8102	31.0108	33.0498	41.3693	35.8721	36.9943	48.6573	32.8298	50.9988	30.1919	41.5501	36.2528
IL-1β (pg/mL)
ABX_Control						ABX_DSS						ABX_Trp_DSS						ABX_Y42_DSS						ABX_Trp_Y42_DSS
29.1499	23.6107	26.1949	24.9615	19.6282	24.909	43.1851	28.2696	36.2431	38.9331	25.4207	30.8193	27.1138	24.004	31.1218	43.5949	36.1904	31.6479	34.2144	18.5813	34.0958	24.4499	25.6962	33.5034	20.9506	24.0565	29.8859	23.6238	25.7618	19.5889
IL-22 (pg/mL)
ABX_Control						ABX_DSS						ABX_Trp_DSS						ABX_Y42_DSS						ABX_Trp_Y42_DSS
22.662	17.8968	24.7877	15.7993	22.0428	14.3267	12.6119	12.1244	16.3282	11.4052	10.1298	12.1099	20.2947	18.421	22.647	19.7976	24.3827	15.7113	21.35	20.8815	17.469	20.7551	17.1596	20.9707	22.4903	25.1406	19.8569	19.2198	20.8517	21.0079
DAO (pg/mL)
ABX_Control						ABX_DSS						ABX_Trp_DSS						ABX_Y42_DSS						ABX_Trp_Y42_DSS
227.241	180.207	109.08	128.167	105.586	218.099	254.179	372.328	399.51	298.489	214.741	371.409	164.309	209.762	241.12	170.461	213.584	133.633	195.628	140.493	182.643	225.621	149.21	139.098	255.912	261.687	269.423	219.488	139.796	247.015
D-LA (pg/mL)
ABX_Control						ABX_DSS						ABX_Trp_DSS						ABX_Y42_DSS						ABX_Trp_Y42_DSS
3.3563	6.51296	5.95788	6.8306	6.31357	7.91999	9.76558	10.6063	8.03796	7.15084	8.97455	6.24998	6.92295	7.51401	5.91737	4.39798	6.51007	9.9831	6.70069	6.35982	6.2095	3.71744	6.15167	4.59551	6.15456	6.36849	4.79873	4.84227	4.53452	5.81318
IAld (pg/mL)
ABX_Control						ABX_DSS						ABX_Trp_DSS						ABX_Y42_DSS						ABX_Trp_Y42_DSS
296.683	305.435	303.898	310.994	302.715	293.962	211.524	152.741	187.514	143.161	175.568	204.309	260.727	225.954	203.245	195.793	195.557	199.578	260.017	203.718	196.503	252.921	236.953	289.231	300.941	277.877	262.974	267.469	275.512	277.759
IPA (pg/mL)
ABX_Control						ABX_DSS						ABX_Trp_DSS						ABX_Y42_DSS						ABX_Trp_Y42_DSS
176.63	183.022	160.967	168.568	194.309	187.283	84.0913	66.6431	71.4226	76.2022	80.9241	96.9903	129.411	122.731	132.175	111.674	115.36	94.5141	142.137	136.09	143.634	139.833	132.347	132.117	140.697	149.68	147.953	154.114	162.176	154.057
ILA (pg/mL)
ABX_Control						ABX_DSS						ABX_Trp_DSS						ABX_Y42_DSS						ABX_Trp_Y42_DSS
172.803	179.357	157.797	162.814	167.244	177.278	63.3329	82.9942	89.5479	103.153	79.1523	102.429	90.6327	103.695	104.915	112.192	108.26	118.249	119.605	112.554	105.684	101.299	101.887	104.011	113.774	108.983	127.379	126.068	119.243	120.554
IAA (pg/mL)
ABX_Control						ABX_DSS						ABX_Trp_DSS						ABX_Y42_DSS						ABX_Trp_Y42_DSS
223.613	229.355	222.061	217.949	203.362	263.185	129.573	108.701	123.521	85.1132	87.9064	127.555	140.979	150.057	121.969	136.866	132.832	119.564	178.3	148.66	157.35	184.74	183.266	171.394	198.939	206.077	168.058	198.939	211.198	205.302
Body Weight (g)
ABX_Control						ABX_DSS						ABX_Trp_DSS						ABX_Y42_DSS						ABX_Trp_Y42_DSS
26.5	27.7	26.8	27.3	24.5	25.1	23	23.4	24.6	24.3	24	22.6	26.6	26	26.3	26.2	26.7	24.5	23.8	26.4	25.5	25.7	25	26.6	25.9	26.6	25.8	26.2	26.9	26
Claudin-1 Mean Optical Density
ABX_Control				ABX_DSS				ABX_Trp_DSS				ABX_Y42_DSS				ABX_Trp_Y42_DSS
0.109	0.121	0.118	0.104	0.091	0.09	0.09	0.089	0.091	0.096	0.094	0.088	0.101	0.1	0.106	0.104	0.103	0.103	0.101	0.103
Occludin Mean Optical Density
ABX_Control				ABX_DSS				ABX_Trp_DSS				ABX_Y42_DSS				ABX_Trp_Y42_DSS
0.096	0.1	0.097	0.103	0.085	0.088	0.088	0.082	0.089	0.093	0.094	0.093	0.092	0.097	0.096	0.099	0.096	0.098	0.096	0.098
ZO-1 Mean Optical Density
ABX_Control				ABX_DSS				ABX_Trp_DSS				ABX_Y42_DSS				ABX_Trp_Y42_DSS
0.132	0.151	0.154	0.148	0.127	0.125	0.129	0.117	0.138	0.124	0.136	0.145	0.136	0.146	0.136	0.144	0.149	0.146	0.149	0.138
MUC2 Mean Optical Density
ABX_Control				ABX_DSS				ABX_Trp_DSS				ABX_Y42_DSS				ABX_Trp_Y42_DSS
0.091	0.09	0.09	0.093	0.073	0.068	0.067	0.072	0.08	0.071	0.086	0.076	0.086	0.085	0.08	0.085	0.085	0.081	0.099	0.085
AhR Mean Optical Density
ABX_Control				ABX_DSS				ABX_Trp_DSS				ABX_Y42_DSS				ABX_Trp_Y42_DSS
0.14	0.139	0.135	0.14	0.132	0.119	0.118	0.123	0.116	0.121	0.121	0.124	0.133	0.132	0.127	0.137	0.131	0.137	0.135	0.134
CYP1a1 Mean Optical Density
ABX_Control				ABX_DSS				ABX_Trp_DSS				ABX_Y42_DSS				ABX_Trp_Y42_DSS
0.135	0.133	0.139	0.14	0.107	0.132	0.128	0.127	0.133	0.133	0.148	0.142	0.142	0.142	0.138	0.13	0.134	0.146	0.155	0.13
